# Supplementary material for: RNA sequencing reveals changes in the microRNAome of transdifferentiating hepatic stellate cells that are conserved between human and rat
Source: PubMed Central journal article supplement (PMC7728773; doi:10.1038/s41598-020-78776-3), 2020-12-10

# **RNA sequencing reveals changes in the microRNAome of transdifferentiating hepatic stellate cells that are conserved between Human and Rat**

Laura Sabater\*<sup>1</sup>, Luigi Locatelli\*<sup>1</sup>, Fiona Oakley<sup>1</sup>, Timothy Hardy<sup>1</sup>,  
Jeremy French<sup>2</sup>, Stuart Robinson<sup>2</sup>, Gourab Sen<sup>2</sup>, Mann DA<sup>§1</sup>, Mann J<sup>§1</sup>

<sup>1</sup> Newcastle Fibrosis Research Group, Bioscience Institute, Faculty of Medical Sciences, Newcastle University, Newcastle upon Tyne, UK.

<sup>2</sup> Department of Hepatobiliary Surgery, Newcastle upon Tyne Hospitals NHS Foundation Trust, Newcastle upon Tyne, UK.

Joint first authors\*, joint senior authors<sup>§</sup>

**Correspondence:** Jelena Mann, Biosciences Institute, Faculty of Medical Sciences, 4th Floor, William Leech Building, Newcastle University, Framlington Place, Newcastle upon Tyne, NE2 4HH, UK. Tel +44 191 208 5902. E-mail Jelena.Mann@newcastle.ac.uk

Please find below all supplementary figures and tables as well as full western blot images.

## **Contents overview**

|                                            |            |
|--------------------------------------------|------------|
| Supplementary Figure 1                     | page 2     |
| Supplementary Tables 1-7                   | pages 3-17 |
| Whole images for western blots in Figure 6 | page 18    |

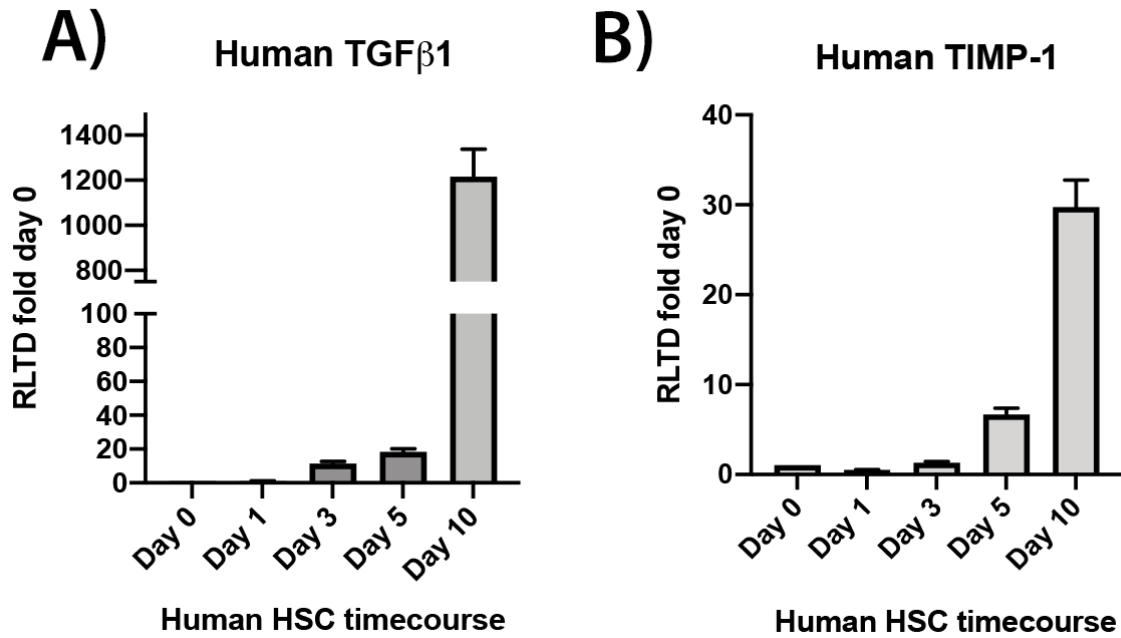

**Supplementary Figure 1-** Quantitative PCR carried out on time-course cDNA isolated from of human HSC preps used in the study showing in A) TGFβ1 and B) TIMP-1 transcript levels.

## Supplementary Table 1 – Human HSC; early activation

### miRNAs upregulated in early activation (day 0 to3)

| miRNA           | log2FoldChange | lfcSE      | pvalue     | padj       |
|-----------------|----------------|------------|------------|------------|
| hsa-mir-4521    | 3.093665956    | 1.10842222 | 0.00525368 | 0.02777805 |
| hsa-mir-98-5p   | 1.712408307    | 0.66729761 | 0.01028243 | 0.04683088 |
| hsa-mir-501-3p  | 1.581409525    | 0.61738464 | 0.01042316 | 0.04700639 |
| hsa-mir-511-5p  | 2.493714167    | 0.89861543 | 0.00551911 | 0.02884988 |
| hsa-mir-34a-5p  | 2.296631888    | 0.7325486  | 0.00171781 | 0.01000241 |
| hsa-mir-132-3p  | 2.77065521     | 0.76329665 | 0.00028358 | 0.0024157  |
| hsa-mir-151a-5p | 2.491799295    | 0.9617711  | 0.00957408 | 0.04448561 |
| hsa-mir-148b-3p | 1.383914077    | 0.54178156 | 0.01063782 | 0.04750869 |
| hsa-mir-532-5p  | 1.581818503    | 0.42430286 | 0.00019297 | 0.00170708 |
| hsa-mir-222-3p  | 2.214546926    | 0.53485399 | 3.47E-05   | 0.00038886 |
| hsa-mir-221-3p  | 1.508757406    | 0.53221723 | 0.00458468 | 0.02452272 |
| hsa-mir-146b-5p | 2.291837685    | 0.65557037 | 0.00047239 | 0.00356906 |
| hsa-let-7i-5p   | 1.680077045    | 0.38470528 | 1.26E-05   | 0.00018093 |
| hsa-mir-24-3p   | 1.118726348    | 0.339062   | 0.00096866 | 0.00645774 |
| hsa-mir-22-3p   | 2.441742349    | 0.48892328 | 5.91E-07   | 1.13E-05   |
| hsa-mir-146a-5p | 2.806629844    | 0.58278187 | 1.47E-06   | 2.70E-05   |
| hsa-mir-155-5p  | 3.338306564    | 0.4251777  | 4.11E-15   | 6.30E-13   |
| hsa-mir-21-5p   | 3.270012077    | 0.56503736 | 7.15E-09   | 2.19E-07   |
| hsa-let-7g-5p   | 1.145965761    | 0.30629287 | 0.00018299 | 0.00165054 |
| hsa-let-7f-5p   | 1.31837284     | 0.44570038 | 0.00309662 | 0.01695769 |

### miRNAs downregulated in early activation (day 0 to 3)

| miRNA            | log2FoldChange | lfcSE      | pvalue     | padj       |
|------------------|----------------|------------|------------|------------|
| hsa-mir-27a-5p   | -4.927912773   | 1.9402573  | 0.01109081 | 0.04905553 |
| hsa-mir-3938     | -4.580566318   | 1.7619624  | 0.00933064 | 0.04432434 |
| hsa-mir-5585-3p  | -4.943326329   | 1.81330514 | 0.00640795 | 0.03239185 |
| hsa-mir-1273g-3p | -2.921192717   | 0.68967871 | 2.28E-05   | 0.00028607 |
| hsa-mir-466      | -5.670071825   | 1.7465658  | 0.0011687  | 0.00746667 |
| hsa-mir-3916     | -5.13863224    | 1.98851907 | 0.00976192 | 0.04490485 |
| hsa-mir-1972     | -5.052428399   | 1.67827265 | 0.00260824 | 0.01445529 |
| hsa-mir-433-3p   | -4.894555857   | 1.88316804 | 0.00934665 | 0.04432434 |
| hsa-mir-6516-3p  | -5.259789355   | 1.66248781 | 0.0015572  | 0.00930278 |
| hsa-mir-1285-3p  | -4.618994712   | 1.5261208  | 0.00247301 | 0.01387298 |
| hsa-mir-1290     | -4.745242374   | 1.74408883 | 0.00651326 | 0.03256628 |
| hsa-mir-5708     | -4.881029375   | 1.57129356 | 0.00189395 | 0.01089024 |
| hsa-mir-3135b    | -4.802068811   | 1.4320667  | 0.0007987  | 0.00556672 |
| hsa-mir-3135a    | -5.956721432   | 1.54582873 | 0.00011648 | 0.00107163 |
| hsa-mir-4512     | -5.890172877   | 1.64089444 | 0.00033117 | 0.00267261 |
| hsa-mir-6073     | -5.651257456   | 1.56814753 | 0.00031362 | 0.00257619 |

|                  |              |            |            |            |
|------------------|--------------|------------|------------|------------|
| hsa-mir-134-5p   | -3.946789236 | 1.50197269 | 0.00859549 | 0.04162029 |
| hsa-mir-1244     | -4.637643221 | 1.69109818 | 0.00609947 | 0.03152535 |
| hsa-mir-4485-5p  | -6.26026085  | 1.81728182 | 0.00057138 | 0.00423927 |
| hsa-mir-1254     | -3.865340287 | 1.08759483 | 0.00037938 | 0.00300889 |
| hsa-mir-6131     | -3.115724024 | 1.02750734 | 0.00242687 | 0.01378224 |
| hsa-mir-663b     | -5.622493849 | 1.44316614 | 9.78E-05   | 0.00093741 |
| hsa-mir-5684     | -6.427333807 | 1.55132326 | 3.43E-05   | 0.00038886 |
| hsa-mir-1268a    | -3.456401133 | 1.02722442 | 0.000766   | 0.00542093 |
| hsa-mir-4516     | -5.627277501 | 1.44323689 | 9.66E-05   | 0.00093741 |
| hsa-mir-3665     | -4.242007579 | 1.21358478 | 0.00047329 | 0.00356906 |
| hsa-mir-4466     | -6.595338744 | 1.64486523 | 6.08E-05   | 0.00063572 |
| hsa-mir-620      | -4.364035891 | 1.30489104 | 0.0008247  | 0.00566214 |
| hsa-mir-3196     | -6.728749894 | 1.58324694 | 2.14E-05   | 0.00028099 |
| hsa-mir-1273h-5p | -3.869696321 | 1.18461195 | 0.00108833 | 0.00705118 |
| hsa-mir-194-5p   | -2.096201418 | 0.80803176 | 0.00948095 | 0.04448561 |
| hsa-mir-503-5p   | -3.3685338   | 1.07217238 | 0.00167922 | 0.00990309 |
| hsa-mir-3656     | -3.653776641 | 1.1302531  | 0.00122623 | 0.00772696 |
| hsa-mir-3609     | -4.296809631 | 1.25632415 | 0.00062588 | 0.00456992 |
| hsa-mir-1273c    | -4.61190671  | 1.15364337 | 6.40E-05   | 0.00065385 |
| hsa-mir-4459     | -3.898721265 | 0.89661574 | 1.37E-05   | 0.00019128 |
| hsa-mir-3651     | -3.531860415 | 0.91322927 | 0.00010998 | 0.0010325  |
| hsa-mir-1324     | -2.622034726 | 0.79592968 | 0.00098666 | 0.00648374 |
| hsa-mir-3159     | -4.663938815 | 1.09704913 | 2.12E-05   | 0.00028099 |
| hsa-mir-8065     | -4.830925554 | 1.174602   | 3.91E-05   | 0.00041813 |
| hsa-mir-3687     | -5.779282903 | 1.20915367 | 1.76E-06   | 3.11E-05   |
| hsa-mir-3182     | -2.523345367 | 0.79210733 | 0.00144449 | 0.00885954 |
| hsa-mir-3195     | -2.980999403 | 1.11707862 | 0.00761755 | 0.03767822 |
| hsa-mir-3648     | -4.915717868 | 0.93291271 | 1.37E-07   | 3.00E-06   |
| hsa-mir-5095     | -4.474421847 | 0.96064893 | 3.20E-06   | 5.07E-05   |
| hsa-mir-663a     | -4.147654839 | 1.00321237 | 3.56E-05   | 0.00038982 |
| hsa-mir-1273d    | -4.937200371 | 0.85938643 | 9.19E-09   | 2.64E-07   |
| hsa-mir-4508     | -3.066511607 | 0.95661186 | 0.00134783 | 0.00837839 |
| hsa-mir-3929     | -4.363879095 | 0.75077366 | 6.15E-09   | 2.02E-07   |
| hsa-mir-1273f    | -4.561024318 | 0.96184835 | 2.12E-06   | 3.48E-05   |
| hsa-mir-1248     | -5.844167904 | 1.22654183 | 1.89E-06   | 3.22E-05   |
| hsa-mir-566      | -4.968170163 | 0.91999426 | 6.66E-08   | 1.80E-06   |
| hsa-mir-139-3p   | -3.796008397 | 0.89666258 | 2.30E-05   | 0.00028607 |
| hsa-mir-7851-3p  | -5.534751787 | 1.03940847 | 1.01E-07   | 2.45E-06   |
| hsa-mir-874-3p   | -2.904417211 | 0.69983333 | 3.32E-05   | 0.00038886 |
| hsa-mir-4472     | -5.907184194 | 0.92020216 | 1.37E-10   | 6.29E-09   |
| hsa-mir-214-3p   | -2.816678459 | 0.88824739 | 0.00151888 | 0.00919322 |
| hsa-mir-7704     | -1.791531369 | 0.62740765 | 0.00429758 | 0.02325752 |
| hsa-mir-370-3p   | -4.245796718 | 1.07999957 | 8.45E-05   | 0.0008449  |

|                  |              |            |            |            |
|------------------|--------------|------------|------------|------------|
| hsa-mir-486-5p   | -4.283353015 | 0.66092582 | 9.12E-11   | 4.66E-09   |
| hsa-mir-1273e    | -4.609534244 | 0.68933721 | 2.28E-11   | 1.75E-09   |
| hsa-mir-3908     | -5.587417263 | 1.04395552 | 8.69E-08   | 2.22E-06   |
| hsa-mir-4488     | -7.173070799 | 1.0315383  | 3.56E-12   | 3.27E-10   |
| hsa-mir-127-3p   | -2.962777458 | 1.08440502 | 0.00629189 | 0.03215856 |
| hsa-mir-8485     | -3.752937319 | 0.74304056 | 4.40E-07   | 8.80E-06   |
| hsa-mir-4792     | -3.643587548 | 1.07410788 | 0.00069334 | 0.00498339 |
| hsa-mir-619-5p   | -5.689610026 | 0.90884548 | 3.84E-10   | 1.61E-08   |
| hsa-mir-4419a    | -3.139784959 | 0.68898735 | 5.19E-06   | 7.95E-05   |
| hsa-mir-1285-5p  | -5.213091064 | 0.8922125  | 5.13E-09   | 1.82E-07   |
| hsa-mir-4485-3p  | -6.390877291 | 1.07848854 | 3.11E-09   | 1.19E-07   |
| hsa-mir-5588-5p  | -5.962099902 | 0.91678455 | 7.86E-11   | 4.52E-09   |
| hsa-mir-6087     | -3.333967067 | 0.92053131 | 0.00029258 | 0.002447   |
| hsa-mir-8086     | -5.905112165 | 0.90650923 | 7.31E-11   | 4.52E-09   |
| hsa-mir-1303     | -2.14617108  | 0.64512565 | 0.00087866 | 0.00594384 |
| hsa-mir-5096     | -5.253503137 | 0.71995622 | 2.94E-13   | 3.38E-11   |
| hsa-mir-3960     | -6.43711702  | 0.77886407 | 1.40E-16   | 3.22E-14   |
| hsa-mir-7110-3p  | -7.391385067 | 0.72973737 | 4.12E-24   | 1.89E-21   |
| hsa-mir-1273g-5p | -5.039410363 | 1.89525308 | 0.00783813 | 0.03835679 |
| hsa-mir-139-5p   | -3.260452817 | 0.87755008 | 0.00020288 | 0.00176084 |
| hsa-mir-1273a    | -3.929675481 | 0.73932009 | 1.07E-07   | 2.45E-06   |
| hsa-mir-7641     | -4.0301839   | 0.90364609 | 8.20E-06   | 0.00012167 |
| hsa-mir-1246     | -2.556101169 | 0.61554299 | 3.29E-05   | 0.00038886 |
| hsa-mir-4791     | -3.54812285  | 0.67617777 | 1.54E-07   | 3.23E-06   |
| hsa-mir-320a     | -2.411148014 | 0.68363384 | 0.00042036 | 0.00327741 |

## Supplementary Table 2 – Human HSC

### miRNAs upregulated during transdifferentiation

| miRNA           | log2FoldChange | lfcSE      | pvalue     | padj       |
|-----------------|----------------|------------|------------|------------|
| hsa-mir-340-3p  | 3.601571086    | 1.31776359 | 0.00627425 | 0.02475164 |
| hsa-mir-133a-3p | 3.441861055    | 1.21704088 | 0.00468315 | 0.01936301 |
| hsa-mir-340-5p  | 2.619855145    | 1.02135308 | 0.01031512 | 0.03791027 |
| hsa-mir-4521    | 3.049608677    | 1.14911491 | 0.0079573  | 0.03001439 |
| hsa-mir-21-3p   | 2.155375494    | 0.74605405 | 0.00386427 | 0.01661638 |
| hsa-mir-98-5p   | 2.009084435    | 0.68512191 | 0.00336301 | 0.01475607 |
| hsa-mir-378d    | 2.449568459    | 0.87348635 | 0.00504169 | 0.02045213 |
| hsa-mir-132-5p  | 3.65147776     | 1.03739749 | 0.0004318  | 0.00241135 |
| hsa-mir-378a-5p | 4.271339771    | 1.19553896 | 0.00035328 | 0.00201273 |
| hsa-mir-34a-5p  | 3.760660708    | 0.76602358 | 9.14E-07   | 1.19E-05   |
| hsa-mir-1249-3p | 2.745379447    | 0.95411971 | 0.00400973 | 0.01707113 |

|                 |             |            |            |            |
|-----------------|-------------|------------|------------|------------|
| hsa-mir-132-3p  | 3.260912844 | 0.80067194 | 4.65E-05   | 0.00036329 |
| hsa-mir-128-3p  | 1.816963439 | 0.65171054 | 0.00530359 | 0.02131351 |
| hsa-mir-148b-3p | 2.61547283  | 0.56985875 | 4.44E-06   | 4.34E-05   |
| hsa-mir-100-5p  | 5.165626523 | 0.95317187 | 5.98E-08   | 1.19E-06   |
| hsa-mir-27a-3p  | 1.257499156 | 0.50601038 | 0.01295059 | 0.04559109 |
| hsa-mir-99b-5p  | 1.759420475 | 0.59302363 | 0.00300854 | 0.01371143 |
| hsa-mir-532-5p  | 1.228350116 | 0.45160567 | 0.00652895 | 0.02525348 |
| hsa-mir-23a-3p  | 1.736766828 | 0.52158204 | 0.00086907 | 0.00461356 |
| hsa-mir-222-3p  | 2.754278638 | 0.57106608 | 1.41E-06   | 1.52E-05   |
| hsa-mir-221-3p  | 2.474904608 | 0.57049053 | 1.44E-05   | 0.00012606 |
| hsa-mir-146b-5p | 2.776877912 | 0.70505605 | 8.20E-05   | 0.00056861 |
| hsa-mir-191-5p  | 1.105065215 | 0.43500972 | 0.01107501 | 0.0403581  |
| hsa-let-7f-5p   | 1.285417013 | 0.48002429 | 0.00741038 | 0.02819879 |
| hsa-mir-24-3p   | 1.969307213 | 0.36375205 | 6.17E-08   | 1.19E-06   |
| hsa-mir-22-3p   | 2.924146451 | 0.5257828  | 2.67E-08   | 6.05E-07   |
| hsa-mir-146a-5p | 3.357794276 | 0.6273702  | 8.69E-08   | 1.49E-06   |
| hsa-mir-155-5p  | 3.056418175 | 0.45668747 | 2.19E-11   | 1.05E-09   |
| hsa-mir-378a-3p | 2.618769456 | 0.67416496 | 0.00010256 | 0.00067845 |
| hsa-mir-21-5p   | 4.648869207 | 0.60865198 | 2.21E-14   | 3.16E-12   |
| hsa-let-7g-5p   | 1.017066526 | 0.33025369 | 0.00207242 | 0.01024302 |
| hsa-let-7i-5p   | 1.793266087 | 0.41516224 | 1.56E-05   | 0.00013189 |

### miRNAs downregulated during transdifferentiation

| miRNA            | log2FoldChange | lfcSE      | pvalue     | padj       |
|------------------|----------------|------------|------------|------------|
| hsa-mir-451a     | -6.629754956   | 2.71178354 | 0.01449345 | 0.04985746 |
| hsa-mir-1273g-5p | -4.991088809   | 1.92495256 | 0.00951878 | 0.03528513 |
| hsa-mir-3916     | -6.318695226   | 2.15943794 | 0.00343259 | 0.01490923 |
| hsa-mir-1972     | -5.482435832   | 1.72017417 | 0.00143687 | 0.00726888 |
| hsa-mir-3149     | -3.874221701   | 1.56052311 | 0.01304117 | 0.04559109 |
| hsa-mir-3658     | -5.098676505   | 1.71132585 | 0.0028884  | 0.01335496 |
| hsa-mir-3133     | -4.471722135   | 1.80830453 | 0.01340287 | 0.0464777  |
| hsa-mir-6516-3p  | -4.885476      | 1.62319929 | 0.00261435 | 0.0124908  |
| hsa-mir-1285-3p  | -4.358047812   | 1.42338505 | 0.00220048 | 0.01075234 |
| hsa-mir-1290     | -4.653685435   | 1.71248571 | 0.00657765 | 0.02525348 |
| hsa-mir-5708     | -4.314091766   | 1.45570237 | 0.00304082 | 0.01371143 |
| hsa-mir-1302     | -5.444568539   | 1.94138785 | 0.0050399  | 0.02045213 |
| hsa-mir-23a-5p   | -3.219848336   | 1.17295637 | 0.00604978 | 0.0240871  |
| hsa-mir-150-3p   | -4.979144741   | 1.37344253 | 0.00028862 | 0.00172372 |
| hsa-mir-4532     | -5.658028751   | 1.74779296 | 0.00120691 | 0.00617823 |
| hsa-mir-3135b    | -3.441374751   | 1.21230625 | 0.00452976 | 0.01891065 |
| hsa-mir-3135a    | -5.944541996   | 1.51775312 | 8.98E-05   | 0.00060321 |
| hsa-mir-4512     | -4.473741561   | 1.51061882 | 0.00306116 | 0.01371143 |
| hsa-mir-6073     | -6.735399212   | 1.69379047 | 6.99E-05   | 0.00049295 |

|                  |              |            |            |            |
|------------------|--------------|------------|------------|------------|
| hsa-mir-4492     | -6.794255107 | 1.57078856 | 1.52E-05   | 0.00013095 |
| hsa-mir-1244     | -4.266073568 | 1.69031871 | 0.01160847 | 0.04159703 |
| hsa-mir-4485-5p  | -6.772787632 | 1.89245153 | 0.00034512 | 0.00200542 |
| hsa-mir-1254     | -4.15697675  | 1.09449851 | 0.00014583 | 0.00092855 |
| hsa-mir-6131     | -4.38292473  | 1.11617811 | 8.61E-05   | 0.00058774 |
| hsa-mir-663b     | -5.310749105 | 1.31581316 | 5.43E-05   | 0.00041731 |
| hsa-mir-320c     | -2.621218215 | 1.00796179 | 0.00930844 | 0.03480546 |
| hsa-mir-5684     | -5.301871404 | 1.42071128 | 0.00019008 | 0.00116766 |
| hsa-mir-1268a    | -4.313652122 | 1.08203058 | 6.70E-05   | 0.00048223 |
| hsa-mir-4516     | -8.463199998 | 1.6352076  | 2.27E-07   | 3.49E-06   |
| hsa-mir-3665     | -6.141942622 | 1.38469456 | 9.18E-06   | 8.58E-05   |
| hsa-mir-4466     | -7.672762293 | 1.77824865 | 1.60E-05   | 0.00013211 |
| hsa-mir-620      | -3.606718178 | 1.25533976 | 0.00406464 | 0.01713524 |
| hsa-mir-3196     | -7.089551839 | 1.60780444 | 1.04E-05   | 9.30E-05   |
| hsa-mir-1273h-5p | -4.237081508 | 1.2280943  | 0.00056032 | 0.00308437 |
| hsa-mir-194-5p   | -2.513186138 | 0.84004186 | 0.00277393 | 0.0130481  |
| hsa-mir-3656     | -7.487343625 | 1.55156194 | 1.40E-06   | 1.52E-05   |
| hsa-mir-3609     | -4.759189383 | 1.30804883 | 0.00027435 | 0.00166155 |
| hsa-mir-1273c    | -4.275876387 | 1.12631199 | 0.00014684 | 0.00092855 |
| hsa-mir-4459     | -4.497945238 | 0.93005333 | 1.32E-06   | 1.50E-05   |
| hsa-mir-3651     | -3.241159869 | 0.90765559 | 0.00035574 | 0.00201273 |
| hsa-mir-1324     | -2.803661088 | 0.81334173 | 0.00056666 | 0.00308437 |
| hsa-mir-3159     | -3.805802599 | 1.06063718 | 0.00033294 | 0.00196115 |
| hsa-mir-8065     | -5.39277989  | 1.22310679 | 1.04E-05   | 9.30E-05   |
| hsa-mir-4497     | -3.738443859 | 1.13587627 | 0.00099746 | 0.00523058 |
| hsa-mir-3687     | -5.789616706 | 1.18674687 | 1.07E-06   | 1.28E-05   |
| hsa-mir-4443     | -1.696225943 | 0.67110968 | 0.01148797 | 0.04151114 |
| hsa-mir-3182     | -2.051684651 | 0.82048503 | 0.01239918 | 0.04406319 |
| hsa-mir-3195     | -6.357976512 | 1.34215125 | 2.17E-06   | 2.27E-05   |
| hsa-mir-3648     | -4.983272207 | 0.92898671 | 8.13E-08   | 1.46E-06   |
| hsa-mir-5095     | -4.897751149 | 1.00148299 | 1.01E-06   | 1.24E-05   |
| hsa-mir-223-3p   | -2.950505524 | 0.94377577 | 0.00177034 | 0.0088517  |
| hsa-mir-663a     | -4.16796229  | 1.04573527 | 6.73E-05   | 0.00048223 |
| hsa-mir-1273d    | -5.134668888 | 0.86038776 | 2.40E-09   | 6.89E-08   |
| hsa-mir-4508     | -4.915802905 | 1.06285399 | 3.74E-06   | 3.74E-05   |
| hsa-mir-3929     | -4.703097195 | 0.76670472 | 8.56E-10   | 3.07E-08   |
| hsa-mir-1273f    | -5.621943787 | 1.03946645 | 6.36E-08   | 1.19E-06   |
| hsa-mir-1275     | -2.684751081 | 0.79698078 | 0.00075537 | 0.0040601  |
| hsa-mir-1248     | -6.931573082 | 1.32420684 | 1.65E-07   | 2.63E-06   |
| hsa-mir-566      | -6.266096117 | 1.00761819 | 5.01E-10   | 1.96E-08   |
| hsa-mir-139-3p   | -3.764457324 | 0.93712661 | 5.89E-05   | 0.00043696 |
| hsa-mir-7851-3p  | -5.642842513 | 1.06314908 | 1.11E-07   | 1.84E-06   |

|                  |              |            |            |            |
|------------------|--------------|------------|------------|------------|
| hsa-mir-874-3p   | -1.961424132 | 0.71859767 | 0.00634273 | 0.02479431 |
| hsa-mir-4472     | -5.260226746 | 0.86722226 | 1.31E-09   | 4.35E-08   |
| hsa-mir-7704     | -2.761206329 | 0.67528152 | 4.33E-05   | 0.00034503 |
| hsa-mir-486-5p   | -4.696591722 | 0.68670393 | 7.96E-12   | 4.89E-10   |
| hsa-mir-1273e    | -5.394096141 | 0.73140402 | 1.64E-13   | 1.77E-11   |
| hsa-mir-3908     | -5.419655604 | 1.07813176 | 4.98E-07   | 6.70E-06   |
| hsa-mir-4488     | -10.05682518 | 1.37828509 | 2.95E-13   | 2.54E-11   |
| hsa-mir-8485     | -3.833456212 | 0.78243891 | 9.61E-07   | 1.22E-05   |
| hsa-mir-4792     | -4.366253949 | 1.1571984  | 0.00016122 | 0.00100468 |
| hsa-mir-619-5p   | -5.09315768  | 0.91454721 | 2.56E-08   | 6.05E-07   |
| hsa-mir-4419a    | -4.193381492 | 0.74533016 | 1.84E-08   | 4.66E-07   |
| hsa-mir-1285-5p  | -5.632494665 | 0.94334189 | 2.36E-09   | 6.89E-08   |
| hsa-mir-106b-3p  | -1.743361255 | 0.53670843 | 0.00116119 | 0.00601579 |
| hsa-mir-4485-3p  | -6.711689265 | 1.13815177 | 3.70E-09   | 9.95E-08   |
| hsa-mir-5588-5p  | -6.424129887 | 0.97303578 | 4.05E-11   | 1.74E-09   |
| hsa-mir-6087     | -5.112499245 | 1.00266964 | 3.42E-07   | 4.90E-06   |
| hsa-mir-8086     | -6.49444848  | 0.9685076  | 2.01E-11   | 1.05E-09   |
| hsa-mir-1303     | -2.673185531 | 0.69466084 | 0.00011899 | 0.00077527 |
| hsa-mir-5096     | -5.553304694 | 0.76827918 | 4.89E-13   | 3.51E-11   |
| hsa-mir-3960     | -9.20842295  | 0.93829785 | 9.80E-23   | 2.11E-20   |
| hsa-mir-7110-3p  | -8.343799603 | 0.78430473 | 1.97E-26   | 8.49E-24   |
| hsa-let-7c-5p    | -2.601618188 | 0.85874501 | 0.00244912 | 0.0118328  |
| hsa-mir-1273g-3p | -3.489203732 | 0.74406565 | 2.74E-06   | 2.81E-05   |
| hsa-mir-150-5p   | -2.406259991 | 0.53280176 | 6.29E-06   | 6.02E-05   |
| hsa-mir-139-5p   | -2.779974447 | 0.94506343 | 0.00326548 | 0.01447585 |
| hsa-mir-1273a    | -4.079851735 | 0.79659769 | 3.03E-07   | 4.49E-06   |
| hsa-mir-7641     | -4.740840667 | 0.97570317 | 1.18E-06   | 1.37E-05   |
| hsa-mir-1246     | -2.673694045 | 0.66393243 | 5.65E-05   | 0.00042607 |
| hsa-mir-4791     | -4.038416091 | 0.72985478 | 3.14E-08   | 6.76E-07   |
| hsa-mir-320a     | -3.029366244 | 0.73822413 | 4.07E-05   | 0.00033004 |
| hsa-mir-122-5p   | -5.406460563 | 1.07048877 | 4.41E-07   | 6.11E-06   |
| hsa-let-7b-5p    | -1.346829069 | 0.45047602 | 0.00279169 | 0.0130481  |

### Supplementary Table 3 – Rat HSC; early activation

#### miRNAs upregulated in early activation (day 0 to 3)

| miRNA          | log2FoldChange | lfcSE      | pvalue     | padj       |
|----------------|----------------|------------|------------|------------|
| rno-mir-142-3p | 3.556145632    | 1.11242457 | 0.00138984 | 0.00678148 |
| rno-mir-18a-3p | 3.071852997    | 0.99473146 | 0.00201425 | 0.00950055 |
| rno-mir-221-5p | 2.416554071    | 0.95516627 | 0.01140682 | 0.04362337 |
| rno-mir-29b-3p | 4.366207502    | 1.19455553 | 0.00025709 | 0.00161682 |
| rno-mir-330-3p | 2.395137907    | 0.8978615  | 0.00763945 | 0.03060809 |



|                   |             |            |            |            |
|-------------------|-------------|------------|------------|------------|
| rno-mir-147       | 2.277161938 | 0.77180634 | 0.0031733  | 0.01425467 |
| rno-mir-877       | 2.642185985 | 0.65831926 | 5.98E-05   | 0.00043405 |
| rno-mir-24-2-5p   | 1.489974273 | 0.50708402 | 0.00329998 | 0.0145921  |
| rno-mir-125b-1-3p | 3.590641396 | 1.16562147 | 0.00206686 | 0.00958889 |
| rno-mir-20a-5p    | 1.38664249  | 0.56164263 | 0.01355271 | 0.0498106  |
| rno-mir-99b-3p    | 1.820009414 | 0.39954453 | 5.23E-06   | 4.36E-05   |
| rno-mir-185-5p    | 1.492254981 | 0.41635008 | 0.0003382  | 0.00199395 |
| rno-mir-17-5p     | 2.117253674 | 0.58094406 | 0.00026791 | 0.00164821 |
| rno-mir-34a-5p    | 3.91919794  | 0.56733386 | 4.91E-12   | 1.07E-10   |
| rno-mir-1839-5p   | 1.955191932 | 0.39541761 | 7.63E-07   | 6.96E-06   |
| rno-mir-466b-5p   | 1.241536118 | 0.33024679 | 0.00017031 | 0.00112033 |
| rno-mir-181b-5p   | 2.327619409 | 0.27277519 | 1.42E-17   | 5.04E-16   |
| rno-mir-222-3p    | 3.642152891 | 0.47725873 | 2.32E-14   | 6.57E-13   |
| rno-mir-155-5p    | 5.008190197 | 0.50785845 | 6.12E-23   | 2.89E-21   |
| rno-mir-466c-5p   | 1.649265034 | 0.30768494 | 8.31E-08   | 9.41E-07   |
| rno-mir-221-3p    | 2.388146496 | 0.47037399 | 3.83E-07   | 3.74E-06   |
| rno-mir-146b-5p   | 4.137153652 | 0.36524025 | 9.62E-30   | 1.36E-27   |
| rno-mir-24-3p     | 1.253626323 | 0.23464355 | 9.16E-08   | 9.97E-07   |
| rno-mir-21-5p     | 1.622988083 | 0.30850635 | 1.43E-07   | 1.50E-06   |
| rno-mir-146a-5p   | 1.796355245 | 0.32983278 | 5.14E-08   | 6.62E-07   |
| rno-let-7i-5p     | 2.125127562 | 0.20832843 | 1.97E-24   | 1.11E-22   |

### miRNAs downregulated in early activation (day 0 to 3)

| miRNA             | log2FoldChange | lfcSE      | pvalue     | padj       |
|-------------------|----------------|------------|------------|------------|
| rno-mir-497-5p    | -3.938305767   | 1.32953189 | 0.00305474 | 0.01394343 |
| rno-mir-150-3p    | -3.830748017   | 1.34870014 | 0.00450675 | 0.01932438 |
| rno-mir-3559-3p   | -3.889959012   | 1.09995108 | 0.00040549 | 0.00234192 |
| rno-mir-192-3p    | -3.436412505   | 1.27326077 | 0.00695676 | 0.0289524  |
| rno-mir-126a-5p   | -5.2844019     | 1.11098752 | 1.97E-06   | 1.69E-05   |
| rno-mir-195-3p    | -4.106314218   | 1.08315616 | 0.00015    | 0.00103539 |
| rno-mir-874-3p    | -2.904655526   | 0.86485226 | 0.00078351 | 0.00418363 |
| rno-mir-200a-3p   | -1.972109602   | 0.70752809 | 0.00531454 | 0.02244799 |
| rno-mir-194-3p    | -6.248034956   | 1.04296216 | 2.09E-09   | 2.96E-08   |
| rno-mir-10b-5p    | -1.858796989   | 0.6972586  | 0.00767906 | 0.03060809 |
| rno-mir-375-3p    | -5.365167349   | 0.98883741 | 5.77E-08   | 7.10E-07   |
| rno-mir-139-3p    | -4.156017551   | 0.81266825 | 3.15E-07   | 3.19E-06   |
| rno-mir-199a-5p   | -4.554112308   | 1.17773869 | 0.00011026 | 0.00078009 |
| rno-mir-322-3p    | -2.781796435   | 0.73976903 | 0.00016967 | 0.00112033 |
| rno-mir-1843a-3p  | -1.746201357   | 0.54453014 | 0.00134218 | 0.00666383 |
| rno-mir-125b-2-3p | -2.083433696   | 0.59977003 | 0.00051329 | 0.00284828 |
| rno-mir-145-5p    | -2.371464996   | 0.91983312 | 0.00993317 | 0.03904289 |
| rno-mir-101b-3p   | -1.695373079   | 0.59687418 | 0.00450542 | 0.01932438 |
| rno-mir-194-5p    | -4.810992367   | 0.70671866 | 9.93E-12   | 2.01E-10   |

|                  |              |            |            |            |
|------------------|--------------|------------|------------|------------|
| rno-mir-122-3p   | -5.00391986  | 0.80710434 | 5.65E-10   | 8.42E-09   |
| rno-mir-200b-3p  | -3.168003554 | 0.47046122 | 1.65E-11   | 3.12E-10   |
| rno-mir-505-3p   | -1.50680401  | 0.42733995 | 0.00042187 | 0.00238781 |
| rno-mir-455-3p   | -4.097011193 | 0.64418898 | 2.02E-10   | 3.17E-09   |
| rno-mir-30e-5p   | -1.032882149 | 0.32009411 | 0.0012518  | 0.00632604 |
| rno-mir-30c-2-3p | -1.43028656  | 0.4327786  | 0.00095013 | 0.00488885 |
| rno-mir-100-5p   | -2.514896091 | 0.59892156 | 2.68E-05   | 0.00021072 |
| rno-mir-26b-5p   | -1.804649082 | 0.33610409 | 7.90E-08   | 9.32E-07   |
| rno-mir-148a-3p  | -2.01528925  | 0.40010279 | 4.73E-07   | 4.46E-06   |
| rno-mir-31a-5p   | -2.174310441 | 0.59867803 | 0.00028139 | 0.00169435 |
| rno-mir-199a-3p  | -3.053475666 | 0.75737457 | 5.54E-05   | 0.00041247 |
| rno-mir-150-5p   | -2.484915536 | 0.44129667 | 1.79E-08   | 2.42E-07   |
| rno-mir-29a-3p   | -1.188716242 | 0.35960418 | 0.00094765 | 0.00488885 |
| rno-mir-23b-3p   | -3.686734222 | 0.43154486 | 1.31E-17   | 5.04E-16   |
| rno-mir-192-5p   | -6.426735128 | 0.61950554 | 3.26E-25   | 2.30E-23   |
| rno-mir-10a-5p   | -3.099392857 | 0.39785762 | 6.69E-15   | 2.10E-13   |
| rno-let-7d-3p    | -1.059175361 | 0.30978218 | 0.00062829 | 0.00341936 |
| rno-mir-139-5p   | -3.436204005 | 0.45312433 | 3.37E-14   | 8.66E-13   |
| rno-mir-27b-3p   | -2.819929586 | 0.37876345 | 9.69E-14   | 2.28E-12   |
| rno-mir-126a-3p  | -7.146214151 | 0.49421219 | 2.17E-47   | 6.15E-45   |
| rno-mir-99a-5p   | -1.902442857 | 0.29205813 | 7.32E-11   | 1.22E-09   |
| rno-let-7b-5p    | -1.742634794 | 0.40041057 | 1.35E-05   | 0.00010902 |
| rno-let-7c-5p    | -1.379356592 | 0.32988378 | 2.90E-05   | 0.00022165 |
| rno-mir-26a-5p   | -2.290980833 | 0.21919238 | 1.44E-25   | 1.35E-23   |
| rno-mir-125b-5p  | -1.698022386 | 0.45234952 | 0.00017418 | 0.00112033 |
| rno-mir-122-5p   | -5.181809071 | 0.77471924 | 2.25E-11   | 3.98E-10   |

## Supplementary Table 4 – Rat HSC

### miRNAs upregulated during transdifferentiation

| miRNA           | log2FoldChange | lfcSE      | pvalue     | padj       |
|-----------------|----------------|------------|------------|------------|
| rno-mir-344a-3p | 3.793983515    | 1.320604   | 0.00406703 | 0.01646378 |
| rno-mir-224-5p  | 3.413848783    | 1.28043455 | 0.00767222 | 0.0271763  |
| rno-mir-149-5p  | 3.134069163    | 1.0027914  | 0.00177597 | 0.00855957 |
| rno-mir-504     | 5.328054699    | 1.88762841 | 0.00476332 | 0.01867223 |
| rno-mir-212-3p  | 3.384961347    | 1.37143755 | 0.01358002 | 0.04436139 |
| rno-mir-183-5p  | 2.414428202    | 0.99337087 | 0.01507632 | 0.04817867 |
| rno-mir-18a-3p  | 2.691192454    | 0.98408405 | 0.00624337 | 0.02353271 |
| rno-mir-221-5p  | 2.350031542    | 0.93214466 | 0.0116988  | 0.03864548 |
| rno-mir-760-3p  | 3.445816119    | 1.02704293 | 0.00079341 | 0.00424112 |
| rno-mir-296-3p  | 5.779121389    | 1.33430888 | 1.48E-05   | 0.00011785 |

|                   |             |            |            |            |
|-------------------|-------------|------------|------------|------------|
| rno-mir-29b-3p    | 3.237991308 | 1.19885373 | 0.00691509 | 0.02541294 |
| rno-mir-298-5p    | 6.310416854 | 1.33647874 | 2.34E-06   | 2.02E-05   |
| rno-mir-132-3p    | 3.139088834 | 0.8770025  | 0.00034446 | 0.00191081 |
| rno-mir-218a-5p   | 2.163696839 | 0.78192083 | 0.00565477 | 0.02159094 |
| rno-mir-702-3p    | 3.342008364 | 0.85291368 | 8.92E-05   | 0.00055772 |
| rno-mir-877       | 2.361853956 | 0.64858028 | 0.00027097 | 0.00156209 |
| rno-mir-3102      | 4.215539873 | 0.91741997 | 4.33E-06   | 3.64E-05   |
| rno-mir-24-2-5p   | 1.305474203 | 0.49436672 | 0.00827349 | 0.02895723 |
| rno-mir-484       | 1.784071659 | 0.56633838 | 0.00163166 | 0.00799514 |
| rno-mir-615       | 6.58352348  | 1.19520395 | 3.62E-08   | 3.55E-07   |
| rno-mir-145-5p    | 1.963672391 | 0.75088265 | 0.00891877 | 0.03048975 |
| rno-mir-324-3p    | 1.163462499 | 0.38748652 | 0.00267694 | 0.01210802 |
| rno-mir-214-3p    | 2.85062594  | 0.70133203 | 4.81E-05   | 0.00032151 |
| rno-mir-125b-1-3p | 7.593472154 | 1.10139784 | 5.41E-12   | 9.94E-11   |
| rno-mir-99b-3p    | 2.349106763 | 0.38289359 | 8.51E-10   | 1.14E-08   |
| rno-mir-185-5p    | 2.314610464 | 0.39719859 | 5.63E-09   | 6.90E-08   |
| rno-mir-17-5p     | 1.513768055 | 0.57861379 | 0.00889151 | 0.03048975 |
| rno-mir-34a-5p    | 4.028363097 | 0.56115884 | 7.04E-13   | 1.48E-11   |
| rno-mir-1839-5p   | 2.184304872 | 0.38630342 | 1.56E-08   | 1.77E-07   |
| rno-mir-210-3p    | 2.743857031 | 0.47951387 | 1.05E-08   | 1.24E-07   |
| rno-mir-1249      | 1.531838788 | 0.45859251 | 0.00083686 | 0.00431646 |
| rno-mir-31a-5p    | 1.496485173 | 0.55806552 | 0.00732802 | 0.02659799 |
| rno-mir-199a-3p   | 1.925243515 | 0.68644647 | 0.00503709 | 0.01948559 |
| rno-mir-181b-5p   | 1.868422591 | 0.27078284 | 5.20E-12   | 9.94E-11   |
| rno-mir-143-3p    | 3.06722427  | 0.72068213 | 2.08E-05   | 0.00015296 |
| rno-mir-222-3p    | 4.099500485 | 0.47396367 | 5.18E-18   | 1.52E-16   |
| rno-mir-155-5p    | 2.854106981 | 0.51178647 | 2.45E-08   | 2.57E-07   |
| rno-mir-221-3p    | 3.118809262 | 0.46736749 | 2.50E-11   | 3.87E-10   |
| rno-mir-146b-5p   | 3.636591273 | 0.36429637 | 1.82E-23   | 1.07E-21   |
| rno-let-7e-5p     | 1.705317443 | 0.19332102 | 1.13E-18   | 3.70E-17   |
| rno-mir-24-3p     | 1.379986885 | 0.2332727  | 3.30E-09   | 4.22E-08   |
| rno-mir-21-5p     | 1.521790683 | 0.30789824 | 7.71E-07   | 6.87E-06   |
| rno-mir-146a-5p   | 1.424975816 | 0.32952676 | 1.53E-05   | 0.00011838 |
| rno-let-7i-5p     | 1.936527401 | 0.20794617 | 1.25E-20   | 4.58E-19   |

### miRNAs downregulated during transdifferentiation

| miRNA           | log2FoldChange | lfcSE      | pvalue     | padj       |
|-----------------|----------------|------------|------------|------------|
| rno-mir-335     | -4.498857247   | 1.30528787 | 0.0005676  | 0.00309029 |
| rno-mir-6215    | -3.839781351   | 1.32774348 | 0.00382846 | 0.01607955 |
| rno-mir-6320    | -2.775544257   | 1.14568882 | 0.01540994 | 0.04819704 |
| rno-mir-203a-3p | -3.482850777   | 1.12383673 | 0.00194128 | 0.00920542 |
| rno-mir-497-5p  | -3.095947885   | 1.2164429  | 0.01092518 | 0.03650004 |

|                  |              |            |            |            |
|------------------|--------------|------------|------------|------------|
| rno-mir-150-3p   | -5.100472916 | 1.35737198 | 0.00017154 | 0.00100868 |
| rno-mir-3559-3p  | -3.248982272 | 0.96994322 | 0.0008091  | 0.00424778 |
| rno-mir-192-3p   | -5.943394771 | 1.39437937 | 2.02E-05   | 0.00015246 |
| rno-mir-126a-5p  | -5.963238724 | 1.11098752 | 7.98E-08   | 7.57E-07   |
| rno-mir-195-3p   | -4.425752823 | 1.08395761 | 4.45E-05   | 0.00030402 |
| rno-mir-148a-5p  | -2.326531482 | 0.73383203 | 0.00152236 | 0.007586   |
| rno-mir-30b-3p   | -1.722478232 | 0.66769273 | 0.00988728 | 0.03341217 |
| rno-mir-200a-3p  | -3.210230727 | 0.77354594 | 3.32E-05   | 0.00023839 |
| rno-mir-194-3p   | -6.92687182  | 1.04296216 | 3.10E-11   | 4.56E-10   |
| rno-mir-30e-3p   | -1.631666969 | 0.55202096 | 0.00311853 | 0.01348306 |
| rno-mir-375-3p   | -7.132135957 | 1.06081491 | 1.78E-11   | 2.90E-10   |
| rno-mir-139-3p   | -5.129640904 | 0.90914607 | 1.68E-08   | 1.83E-07   |
| rno-mir-1843a-3p | -1.470064507 | 0.49973843 | 0.0032645  | 0.0139096  |
| rno-mir-101b-3p  | -1.646214528 | 0.57333531 | 0.00408794 | 0.01646378 |
| rno-mir-194-5p   | -5.345133771 | 0.700049   | 2.25E-14   | 5.09E-13   |
| rno-mir-122-3p   | -8.84798885  | 1.11370638 | 1.95E-15   | 4.77E-14   |
| rno-mir-532-3p   | -1.39213834  | 0.4889499  | 0.00441056 | 0.01752303 |
| rno-mir-320-5p   | -1.379656022 | 0.47817391 | 0.00391091 | 0.01619446 |
| rno-mir-200b-3p  | -4.019265169 | 0.48113859 | 6.62E-17   | 1.77E-15   |
| rno-mir-505-3p   | -1.706336957 | 0.41292118 | 3.59E-05   | 0.00025135 |
| rno-mir-455-3p   | -1.981187129 | 0.5466664  | 0.00028994 | 0.00163929 |
| rno-mir-30c-2-3p | -1.663518148 | 0.4220059  | 8.08E-05   | 0.0005166  |
| rno-mir-30a-3p   | -1.447351954 | 0.3729392  | 0.00010406 | 0.00063735 |
| rno-mir-26b-5p   | -2.276257573 | 0.33119769 | 6.30E-12   | 1.09E-10   |
| rno-mir-148a-3p  | -2.160846398 | 0.39053886 | 3.15E-08   | 3.19E-07   |
| rno-mir-150-5p   | -4.756016827 | 0.47496771 | 1.33E-23   | 9.79E-22   |
| rno-mir-29a-3p   | -1.066129721 | 0.35318518 | 0.00253934 | 0.01166509 |
| rno-mir-23b-3p   | -1.275657192 | 0.39567794 | 0.00126423 | 0.00640833 |
| rno-mir-27a-3p   | -1.389263014 | 0.30383009 | 4.82E-06   | 3.94E-05   |
| rno-mir-192-5p   | -8.482964793 | 0.72813939 | 2.29E-31   | 3.37E-29   |
| rno-mir-10a-5p   | -2.503339037 | 0.38551637 | 8.39E-11   | 1.17E-09   |
| rno-mir-139-5p   | -5.302658502 | 0.46385312 | 2.90E-30   | 2.84E-28   |
| rno-mir-126a-3p  | -8.239730125 | 0.52015203 | 1.62E-56   | 4.77E-54   |
| rno-mir-99a-5p   | -1.516216558 | 0.28863543 | 1.50E-07   | 1.37E-06   |
| rno-mir-26a-5p   | -2.092000928 | 0.2161814  | 3.77E-22   | 1.85E-20   |
| rno-mir-122-5p   | -7.382613566 | 0.77540318 | 1.72E-21   | 7.20E-20   |

**Supplementary Table 5- miR-150 target genes and their function**

| <b>Ortholog of target gene</b> | <b>Gene name</b>                                                  |
|--------------------------------|-------------------------------------------------------------------|
| <b>MYB</b>                     | v-myb avian myeloblastosis viral oncogene homolog                 |
| <b>TADA1</b>                   | transcriptional adaptor 1                                         |
| <b>ABCB9</b>                   | ATP-binding cassette, sub-family B (MDR/TAP), member 9            |
| <b>FTO</b>                     | fat mass and obesity associated                                   |
| <b>TMEM41A</b>                 | transmembrane protein 41A                                         |
| <b>KLHL12</b>                  | kelch-like family member 12                                       |
| <b>HILPDA</b>                  | hypoxia inducible lipid droplet-associated                        |
| <b>NKX2-4</b>                  | NK2 homeobox 4                                                    |
| <b>MBD6</b>                    | methyl-CpG binding domain protein 6                               |
| <b>GRIPAP1</b>                 | GRIP1 associated protein 1                                        |
| <b>SP1</b>                     | Sp1 transcription factor                                          |
| <b>NR2F2</b>                   | nuclear receptor subfamily 2, group F, member 2                   |
| <b>FOXD3</b>                   | forkhead box D3                                                   |
| <b>DYRK1A</b>                  | dual-specificity tyrosine-(Y)-phosphorylation regulated kinase 1A |
| <b>MTCH2</b>                   | mitochondrial carrier 2                                           |
| <b>PAX5</b>                    | paired box 5                                                      |
| <b>IGF2BP1</b>                 | insulin-like growth factor 2 mRNA binding protein 1               |
| <b>PIK3AP1</b>                 | phosphoinositide-3-kinase adaptor protein 1                       |
| <b>CDKN1B</b>                  | cyclin-dependent kinase inhibitor 1B (p27, Kip1)                  |
| <b>EGR2</b>                    | early growth response 2                                           |
| <b>PTP4A1</b>                  | protein tyrosine phosphatase type IVA, member 1                   |
| <b>ADIPOR2</b>                 | adiponectin receptor 2                                            |
| <b>AGO1</b>                    | argonaute RISC catalytic component 1                              |
| <b>DDB2</b>                    | damage-specific DNA binding protein 2, 48kDa                      |
| <b>PKP4</b>                    | plakophilin 4                                                     |
| <b>PSEN1</b>                   | presenilin 1                                                      |
| <b>ZEB1</b>                    | zinc finger E-box binding homeobox 1                              |
| <b>TLR5</b>                    | toll-like receptor 5                                              |
| <b>H1FO</b>                    | H1 histone family, member 0                                       |
| <b>UBR1</b>                    | ubiquitin protein ligase E3 component n-recogin 1                 |
| <b>AKT3</b>                    | v-akt murine thymoma viral oncogene homolog 3                     |
| <b>EIF4E</b>                   | eukaryotic translation initiation factor 4E                       |
| <b>UST</b>                     | uronyl-2-sulfotransferase                                         |
| <b>SIM1</b>                    | single-minded homolog 1 (Drosophila)                              |
| <b>FOXP1</b>                   | forkhead box P1                                                   |

|                  |                                                                                  |
|------------------|----------------------------------------------------------------------------------|
| <b>RSF1</b>      | remodeling and spacing factor 1                                                  |
| <b>EP300</b>     | E1A binding protein p300                                                         |
| <b>PPP2CB</b>    | protein phosphatase 2, catalytic subunit, beta isozyme                           |
| <b>CALU</b>      | calumenin                                                                        |
| <b>HNRNPH3</b>   | heterogeneous nuclear ribonucleoprotein H3 (2H9)                                 |
| <b>GABRG2</b>    | gamma-aminobutyric acid (GABA) A receptor, gamma 2                               |
| <b>CC2D1B</b>    | coiled-coil and C2 domain containing 1B                                          |
| <b>NCOA1</b>     | nuclear receptor coactivator 1                                                   |
| <b>KIAA0087</b>  | KIAA0087                                                                         |
| <b>KIAA1549L</b> | KIAA1549-like                                                                    |
| <b>ZBTB4</b>     | zinc finger and BTB domain containing 4                                          |
| <b>GTF3C2</b>    | general transcription factor IIIC, polypeptide 2, beta 110kDa                    |
| <b>LETMD1</b>    | LETM1 domain containing 1                                                        |
| <b>MMP14</b>     | matrix metalloproteinase 14 (membrane-inserted)                                  |
| <b>LMO4</b>      | LIM domain only 4                                                                |
| <b>CELSR3</b>    | cadherin, EGF LAG seven-pass G-type receptor 3                                   |
| <b>SRCIN1</b>    | SRC kinase signaling inhibitor 1                                                 |
| <b>UBFD1</b>     | ubiquitin family domain containing 1                                             |
| <b>ETF1</b>      | eukaryotic translation termination factor 1                                      |
| <b>ITSN1</b>     | intersectin 1 (SH3 domain protein)                                               |
| <b>NR1D2</b>     | nuclear receptor subfamily 1, group D, member 2                                  |
| <b>USP13</b>     | ubiquitin specific peptidase 13 (isopeptidase T-3)                               |
| <b>ROCK1</b>     | Rho-associated, coiled-coil containing protein kinase 1                          |
| <b>EPHB2</b>     | EPH receptor B2                                                                  |
| <b>APC</b>       | adenomatous polyposis coli                                                       |
| <b>PAPD5</b>     | PAP associated domain containing 5                                               |
| <b>ACVR1C</b>    | activin A receptor, type IC                                                      |
| <b>UPF1</b>      | UPF1 regulator of nonsense transcripts homolog (yeast)                           |
| <b>GSTO2</b>     | glutathione S-transferase omega 2                                                |
| <b>TAF1</b>      | TAF1 RNA polymerase II, TATA box binding protein (TBP)-associated factor, 250kDa |
| <b>CHD2</b>      | chromodomain helicase DNA binding protein 2                                      |
| <b>FOXO4</b>     | forkhead box O4                                                                  |
| <b>IL1RAPL1</b>  | interleukin 1 receptor accessory protein-like 1                                  |
| <b>PFN2</b>      | profilin 2                                                                       |
| <b>RC3H1</b>     | ring finger and CCCH-type domains 1                                              |
| <b>FGFR3</b>     | fibroblast growth factor receptor 3                                              |
| <b>EDA</b>       | ectodysplasin A                                                                  |

|                |                                                                                         |
|----------------|-----------------------------------------------------------------------------------------|
| <b>FZD4</b>    | frizzled family receptor 4                                                              |
| <b>TET3</b>    | tet methylcytosine dioxygenase 3                                                        |
| <b>CAPN6</b>   | calpain 6                                                                               |
| <b>CPEB4</b>   | cytoplasmic polyadenylation element binding protein 4                                   |
| <b>GLIS3</b>   | GLIS family zinc finger 3                                                               |
| <b>PRKCA</b>   | protein kinase C, alpha                                                                 |
| <b>MAP3K9</b>  | mitogen-activated protein kinase kinase kinase 9                                        |
| <b>NFASC</b>   | neurofascin                                                                             |
| <b>COL4A4</b>  | collagen, type IV, alpha 4                                                              |
| <b>MMP16</b>   | matrix metalloproteinase 16 (membrane-inserted)                                         |
| <b>STEAP3</b>  | STEAP family member 3, metalloredutase                                                  |
| <b>PARVA</b>   | parvin, alpha                                                                           |
| <b>PAPPA</b>   | pregnancy-associated plasma protein A, pappalysin 1                                     |
| <b>CPD</b>     | carboxypeptidase D                                                                      |
| <b>CMIP</b>    | c-Maf inducing protein                                                                  |
| <b>DST</b>     | dystonin                                                                                |
| <b>FBXW11</b>  | F-box and WD repeat domain containing 11                                                |
| <b>UBE3B</b>   | ubiquitin protein ligase E3B                                                            |
| <b>MAP3K12</b> | mitogen-activated protein kinase kinase kinase 12                                       |
| <b>ZDHC3</b>   | zinc finger, DHHC-type containing 3                                                     |
| <b>GLG1</b>    | golgi glycoprotein 1                                                                    |
| <b>PA2G4</b>   | proliferation-associated 2G4, 38kDa                                                     |
| <b>PLXNC1</b>  | plexin C1                                                                               |
| <b>RARG</b>    | retinoic acid receptor, gamma                                                           |
| <b>GSK3B</b>   | glycogen synthase kinase 3 beta                                                         |
| <b>GID4</b>    | GID complex subunit 4                                                                   |
| <b>MGA</b>     | MGA, MAX dimerization protein                                                           |
| <b>CBX8</b>    | chromobox homolog 8                                                                     |
| <b>ATP8A2</b>  | ATPase, aminophospholipid transporter, class I, type 8A, member 2                       |
| <b>PLXNB1</b>  | plexin B1                                                                               |
| <b>USP49</b>   | ubiquitin specific peptidase 49                                                         |
| <b>BCL9L</b>   | B-cell CLL/lymphoma 9-like                                                              |
| <b>HIF1A</b>   | hypoxia inducible factor 1, alpha subunit (basic helix-loop-helix transcription factor) |
| <b>THBS2</b>   | thrombospondin 2                                                                        |
| <b>ABI2</b>    | abl-interactor 2                                                                        |
| <b>FNDC5</b>   | fibronectin type III domain containing 5                                                |
| <b>PLRG1</b>   | pleiotropic regulator 1                                                                 |

|                |                                                                                                                       |
|----------------|-----------------------------------------------------------------------------------------------------------------------|
| <b>GHSR</b>    | growth hormone secretagogue receptor                                                                                  |
| <b>IRF2BP2</b> | interferon regulatory factor 2 binding protein 2                                                                      |
| <b>NOTCH3</b>  | Notch Receptor 3; receptor for membrane-bound ligands Jagged1, Jagged2 and Delta1 to regulate cell-fate determination |
| <b>MUC4</b>    | Major constituent of mucus, may play a role in tumour progression                                                     |
| <b>VEGFA</b>   | Vascular Endothelial Growth Factor A, member of the PDGF/VEGF growth factor family                                    |
| <b>P2RX7</b>   | Purinergic Receptor P2X 7, a member of purinoceptors for ATP; functions as a ligand-gated ion channel                 |
| <b>IGF2</b>    | Insulin-like growth factor 2                                                                                          |
| <b>ZEB1</b>    | Zinc Finger E-Box Binding Homeobox 1, zinc finger transcription factor                                                |
| <b>CXCR4</b>   | C-X-C Motif Chemokine Receptor 4; chemokine receptor specific for stromal cell-derived factor-1                       |

**Supplementary Table 6 – ALD patient characteristics**

| Gender | Age (years) | Bilirubin (umol/L) | Platelets (x10 <sup>9</sup> per litre) | ALT (U/L) | PT (secs) | Creatinine (umol/L) | Sodium (mmol/L) |
|--------|-------------|--------------------|----------------------------------------|-----------|-----------|---------------------|-----------------|
| M      | 48          | 49                 | 79                                     | 18        | 16        | 68                  | 140             |
| M      | 63          | 39                 | 215                                    | 21        | 17        | 74                  | 132             |
| M      | 56          | 168                | 130                                    | 67        | 12        | 73                  | 138             |
| M      | 62          | 20                 | 72                                     | 22        | 14        | 92                  | 139             |
| M      | 60          | 11                 | 179                                    | 25        | 11        | 76                  | 144             |
| M      | 64          | 25                 | 155                                    | 35        | 11        | 208                 | 131             |
| M      | 55          | 70                 | 65                                     | 23        | 23        | 49                  | 143             |
| M      | 47          | 26                 | 133                                    | 33        | 14        | 83                  | 135             |
| M      | 61          | 11                 | 245                                    | 51        | 11        | 83                  | 138             |
| M      | 58          | 23                 | 103                                    | 17        | 13        | 145                 | 129             |
| F      | 65          | 7                  | 167                                    | 50        | 13        | 71                  | 141             |
| M      | 59          | 36                 | 115                                    | 24        | 14        | 49                  | 139             |
| M      | 63          | 25                 | 123                                    | 14        | 13        | 107                 | 142             |
| M      | 75          | 3                  | 221                                    | 13        | 11        | 124                 | 140             |
| F      | 64          | 4                  | 588                                    | 19        | 12        | 47                  | 140             |
| M      | 58          | 14                 | 259                                    | 28        | 15        | 55                  | 136             |
| F      | 69          | 12                 | 174                                    | 30        | 12        | 77                  | 142             |
| M      | 47          | 22                 | 113                                    | 39        | 12        | 62                  | 141             |
| M      | 34          | 15                 | 127                                    | 70        | 11        | 109                 | 145             |
| M      | 68          | 11                 | 116                                    | 17        | 14        | 66                  | 141             |



**Supplementary Table 7 – Control patient characteristics**

| Gender | Age (years) |
|--------|-------------|
| M      | 45          |
| M      | 57          |
| F      | 31          |
| M      | 33          |
| F      | 28          |
| F      | 34          |
| M      | 29          |
| F      | 28          |
| M      | 34          |
| M      | 30          |

Western blots- full images

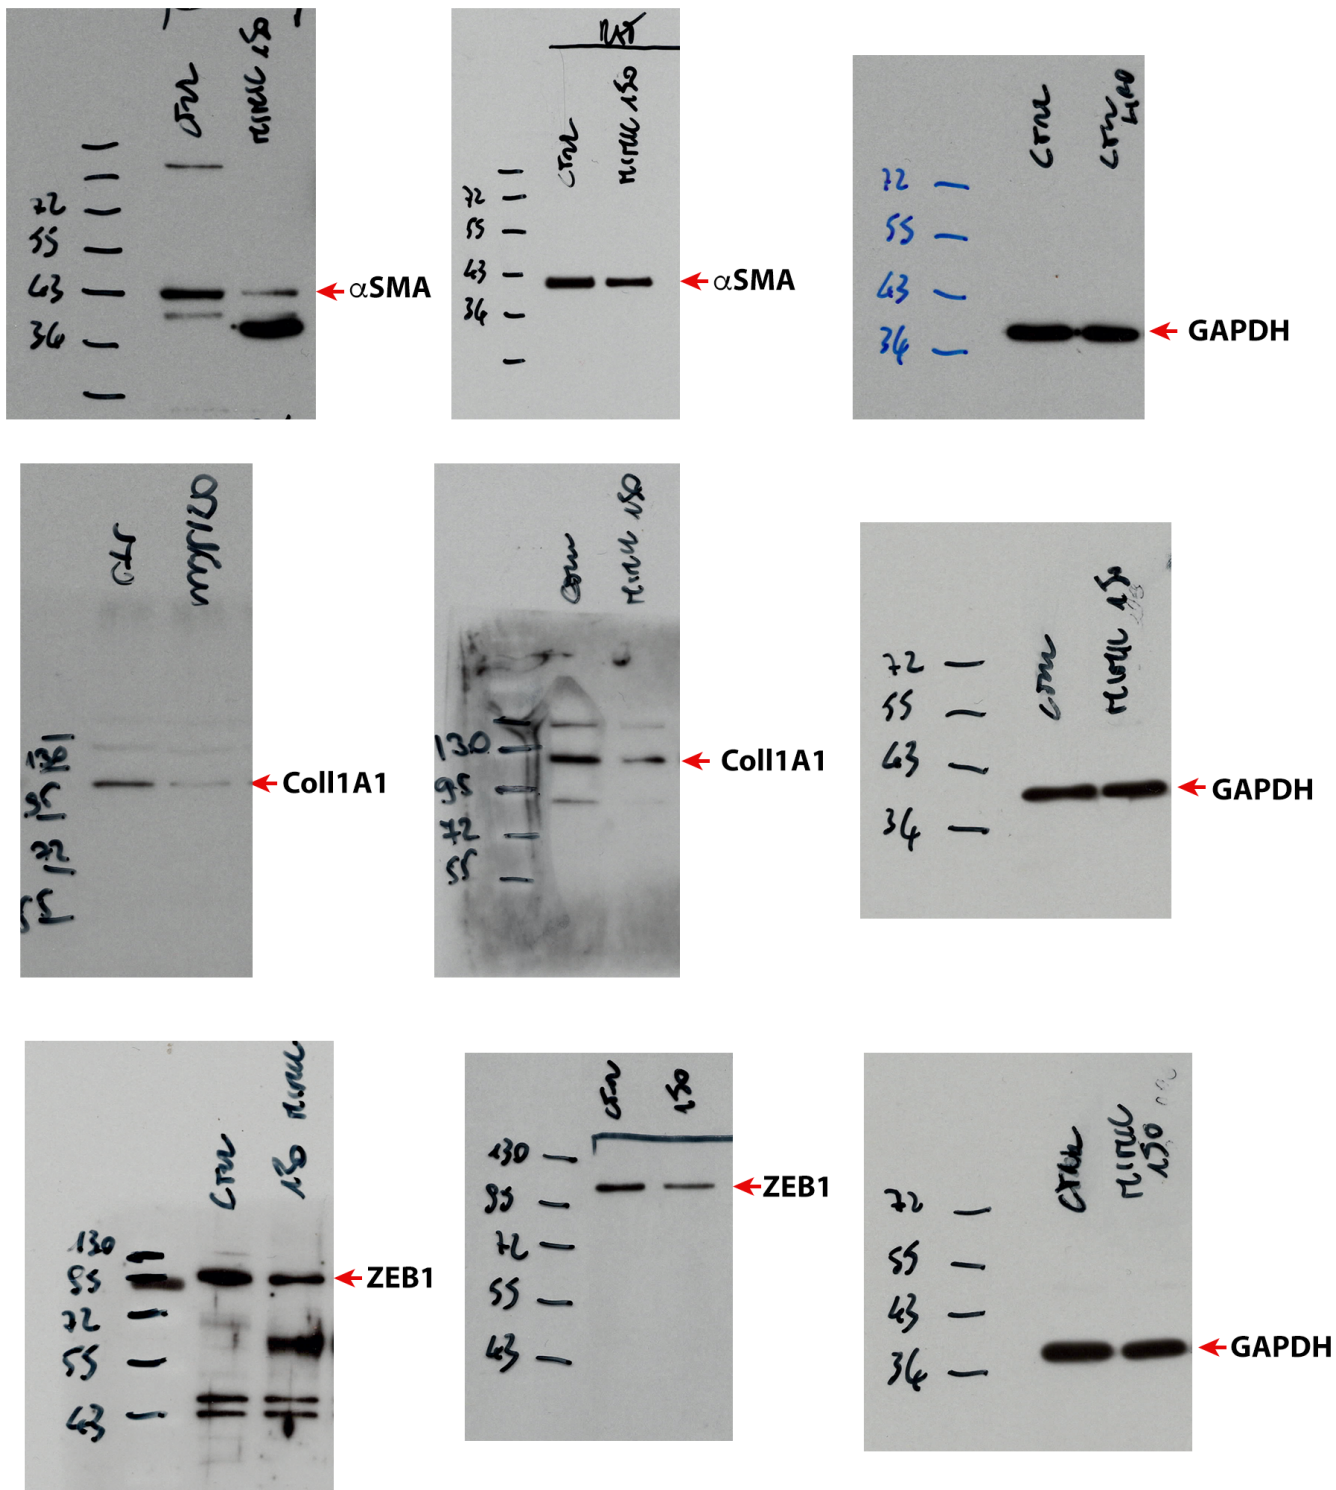

Supplement: 41598_2020_78776_MOESM1_ESM.pdf [file 41598_2020_78776_MOESM1_ESM.pdf]
